# Supplementary material for: Reducing Door‐to‐Puncture Times for Intra‐Arterial Stroke Therapy: A Pilot Quality Improvement Project
Source: PubMed Central journal article supplement — J Am Heart Assoc. 2014 Nov 11;3(6):e000963. doi: 10.1161/JAHA.114.000963 (PMC4338685; doi:10.1161/jaha.114.000963), 2014-11-11

## Supplement 1 – LEAN Model for Process Change Implementation

---

|               |             |                                                                                                                                                                                                                                                                                                                                                                                            |                                                                                                                                                                                                                                                                                                                                                                     |
|---------------|-------------|--------------------------------------------------------------------------------------------------------------------------------------------------------------------------------------------------------------------------------------------------------------------------------------------------------------------------------------------------------------------------------------------|---------------------------------------------------------------------------------------------------------------------------------------------------------------------------------------------------------------------------------------------------------------------------------------------------------------------------------------------------------------------|
| <b>Impact</b> | <b>High</b> | <ul style="list-style-type: none"> <li>Stroke fellow alerting neurointerventional (NI) fellow based on clinical suspicion of large vessel occlusion</li> <li>NI fellow alerting techs, anesthesia upon confirmation of vessel occlusion</li> <li>Transfer from scanner directly to angio suite, instead of holding patient in ED for elective intubation, nursing communication</li> </ul> | <ul style="list-style-type: none"> <li>Neurology resident monitoring time lapsed during each evaluation phase</li> <li>Neuroradiology fellow verifying scan order entry prior to patient arrival to scanners</li> <li>Stroke fellow transfers patient to angio suite and updates anesthesia on arrival, permitting NI fellow to begin angio setup sooner</li> </ul> |
|               | <b>Low</b>  | <ul style="list-style-type: none"> <li>Neurology resident locating healthcare proxy for possible procedure consent, completion of MRI checklist</li> <li>Perform diffusion-weighted imaging (DWI) first for intra-arterial therapy (IAT) decision-making</li> <li>NI fellow updating angio suite to continue setup once decision made to treat</li> </ul>                                  | <ul style="list-style-type: none"> <li>Pre-order scans for TeleStroke patients</li> <li>Get transport equipment ready for scanner upon patient arrival</li> <li>Request research fellow's presence in ED upon patient arrival to initiate consent process for clinical trials as soon as vessel occlusion is confirmed</li> </ul>                                   |
|               |             | <b>Easy</b>                                                                                                                                                                                                                                                                                                                                                                                | <b>Difficult</b>                                                                                                                                                                                                                                                                                                                                                    |
|               |             | <b>Effort</b>                                                                                                                                                                                                                                                                                                                                                                              |                                                                                                                                                                                                                                                                                                                                                                     |

## Supplement 2 – Sources of Delays in Sequential IAT Process

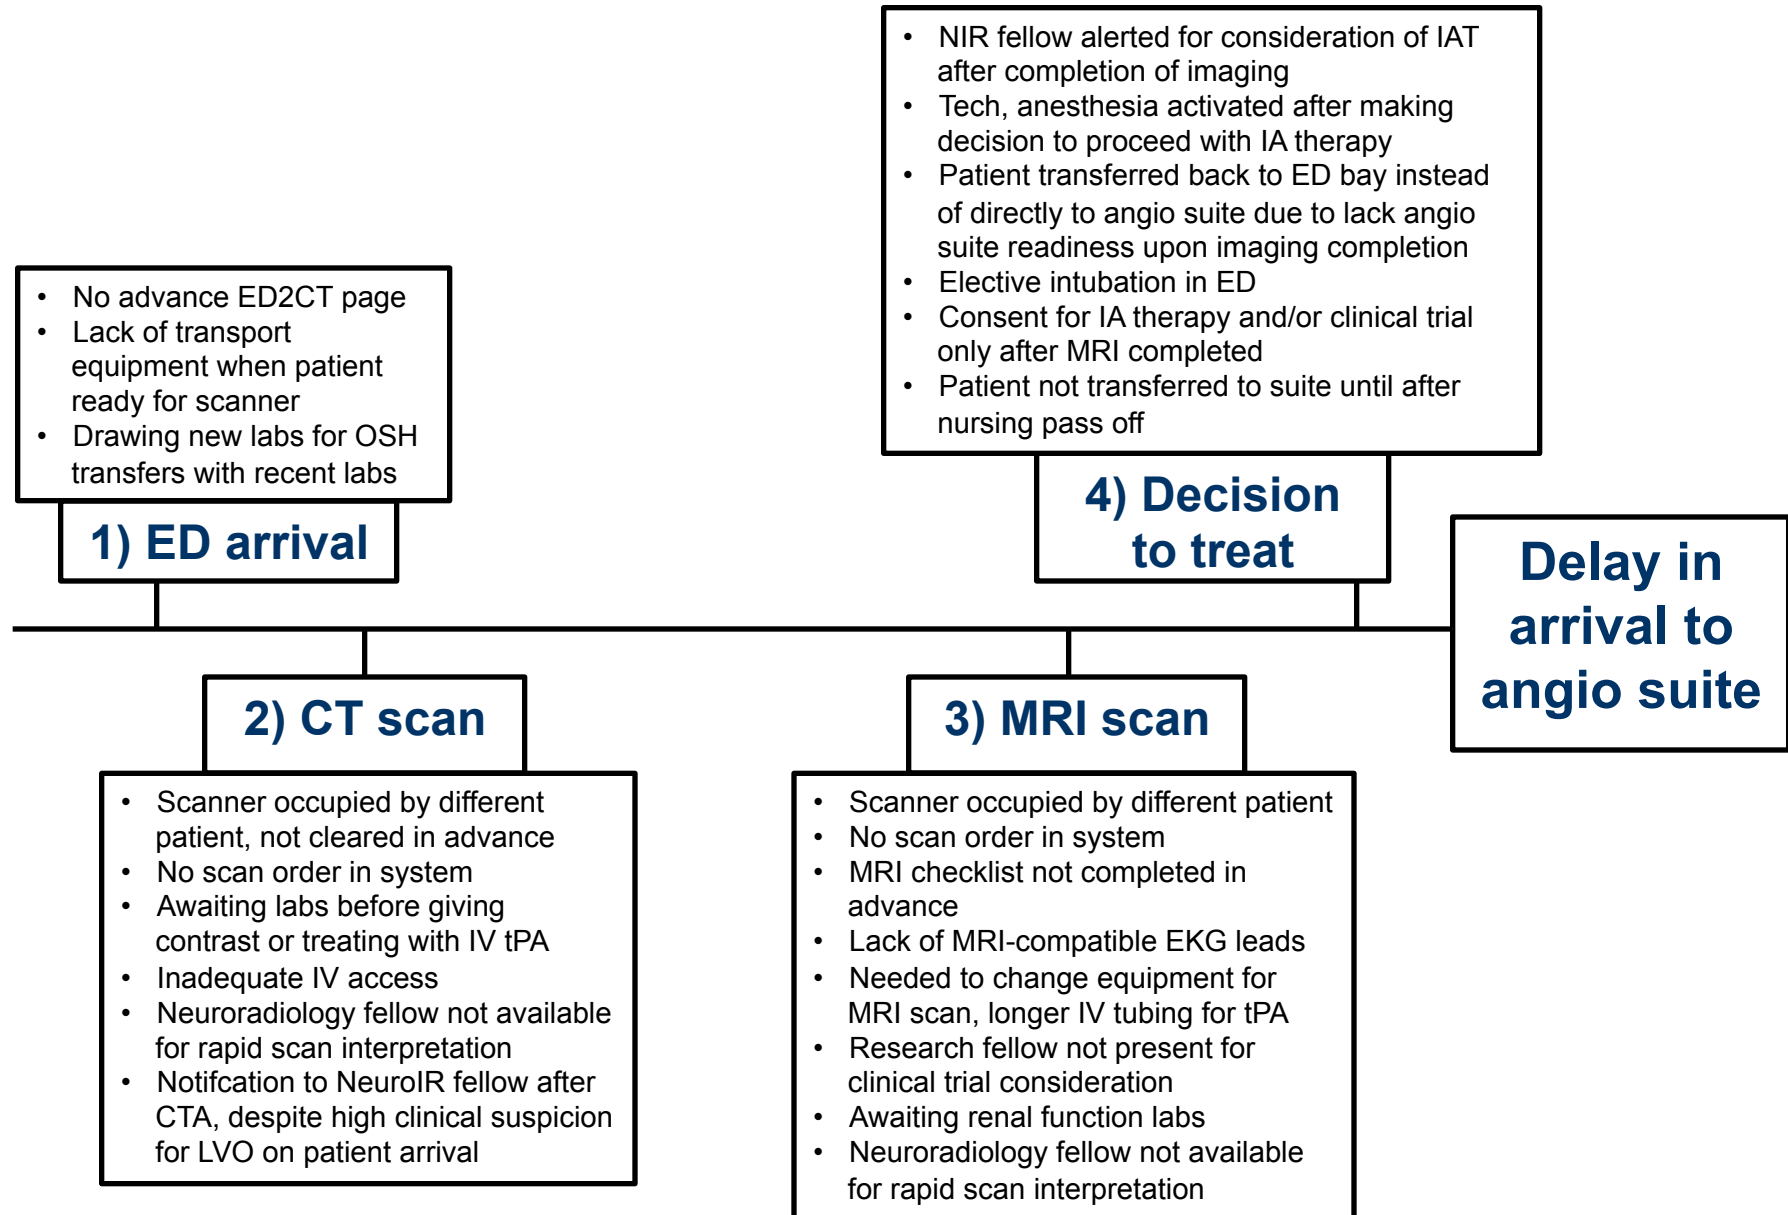

## Supplement 3 – Team Member Roles in Parallel IAT Workflow

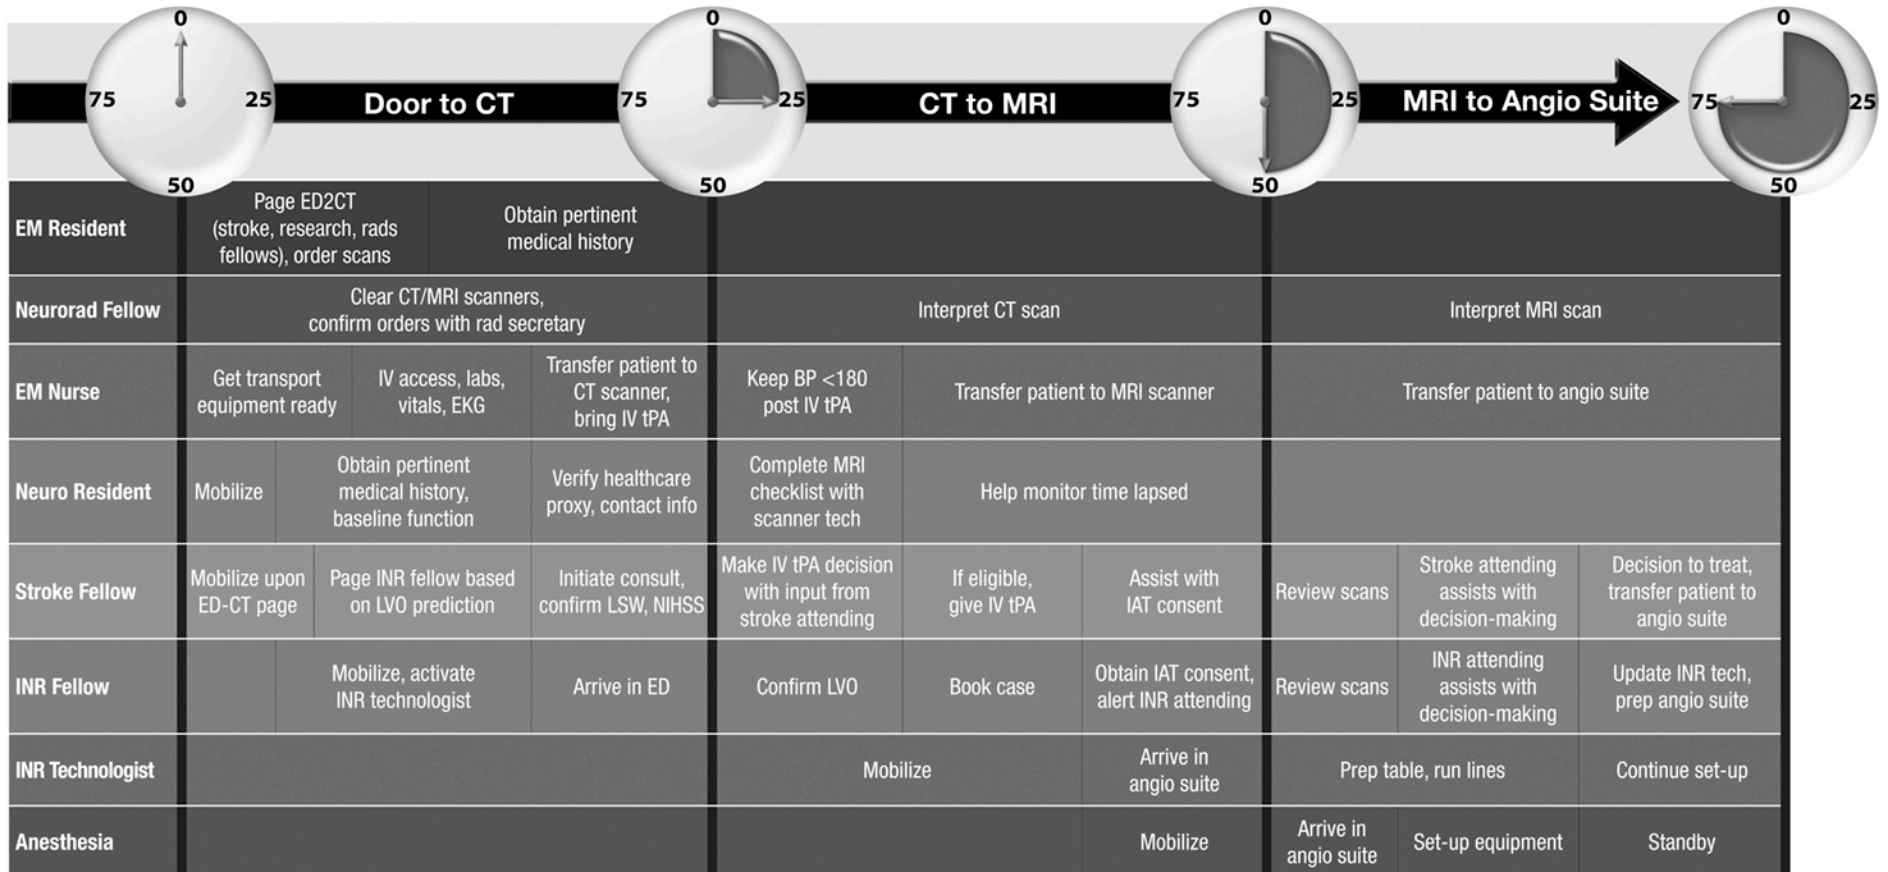

## Supplement 4 – Reduction in Case-to-Case Variability with a Standardized IAT Process.

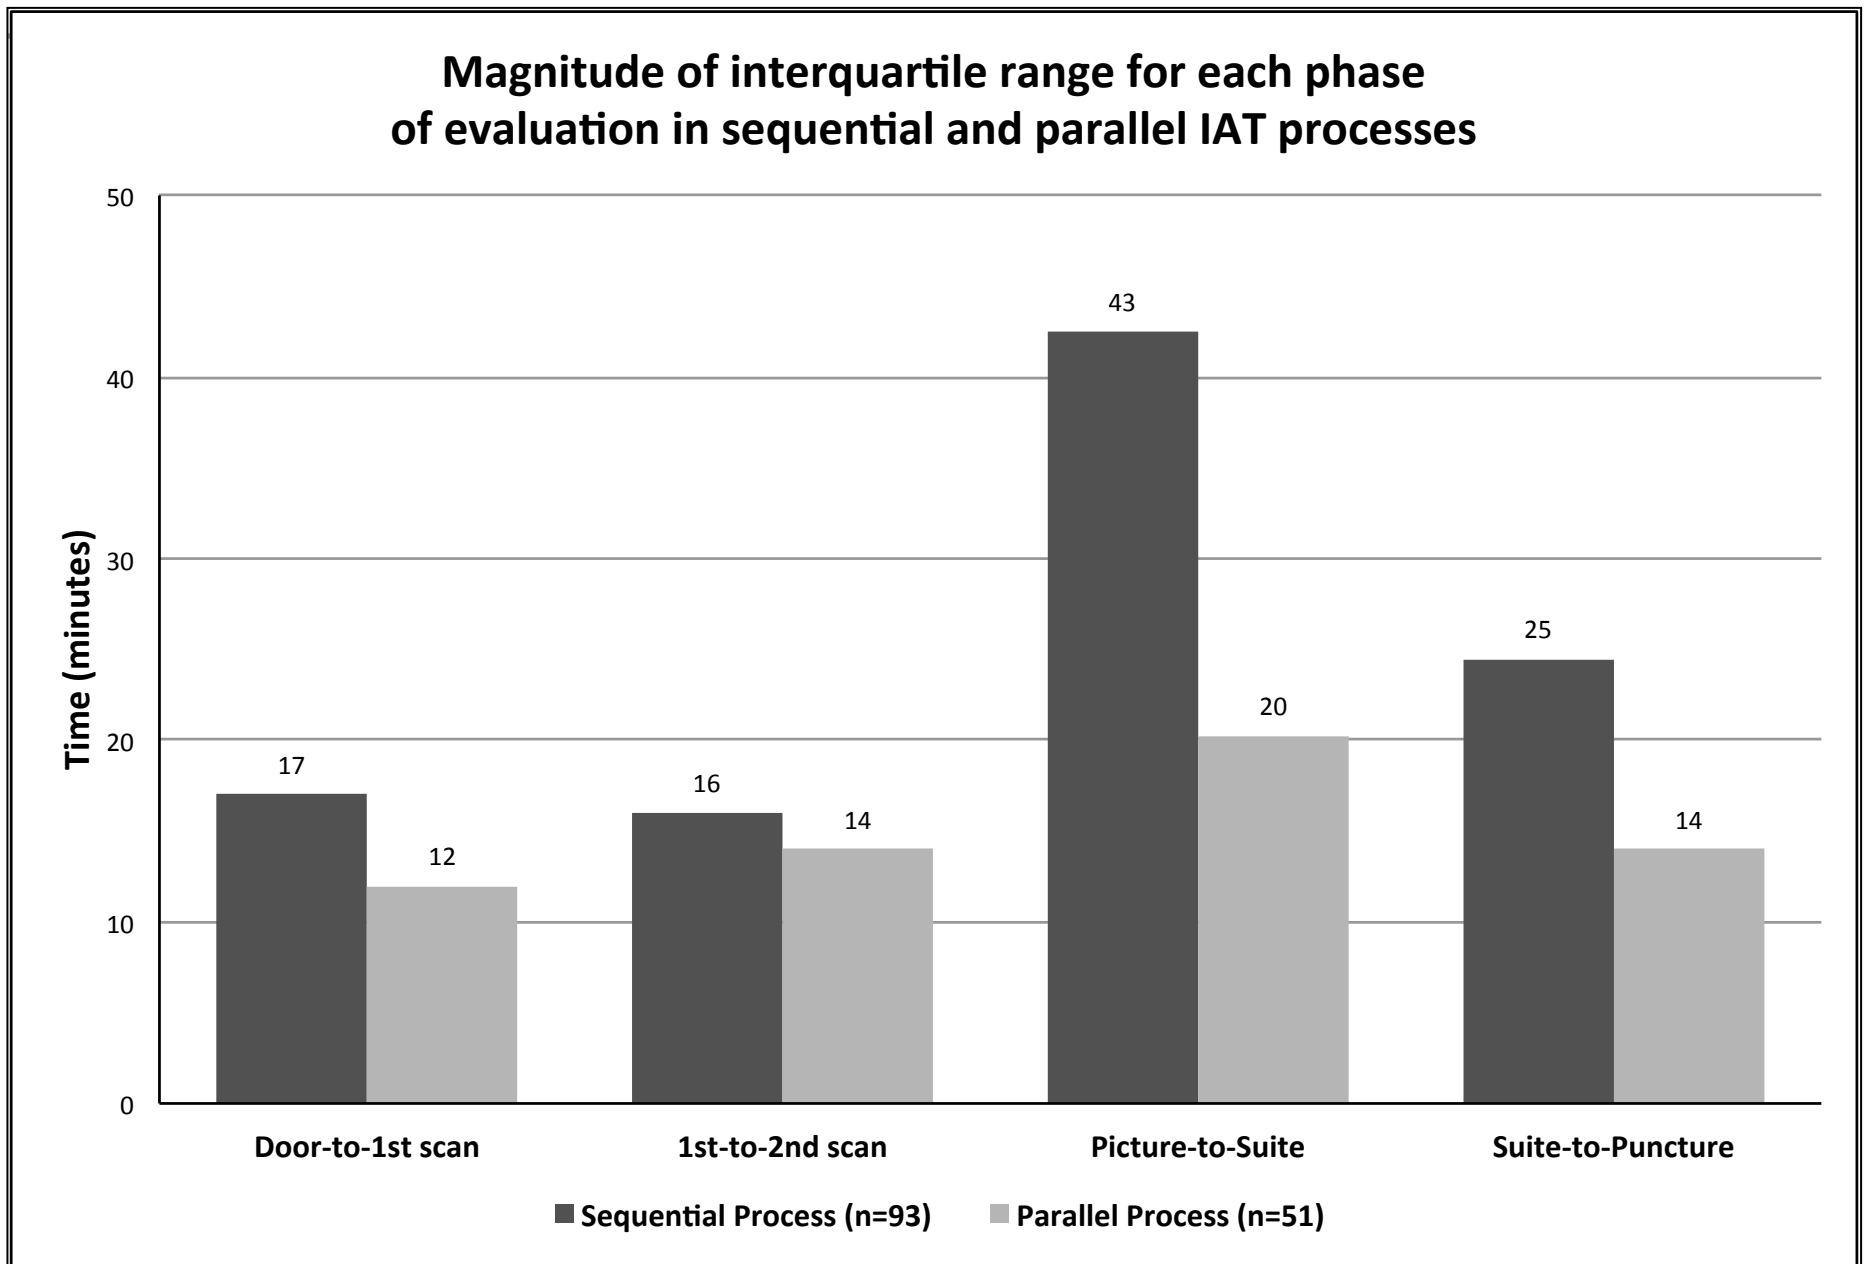

Supplement: jah3-3-e000963-s1.pdf [file jah3-3-e000963-s1.pdf]
